# Supplementary material for: Enhanced photothermal signal detection by graphene oxide integrated long period fiber grating for on-site quantification of sodium copper chlorophyllin
Source: Royal Society of Chemistry journal article supplement (doi:10.1039/d1an00444a), 2021-01-01
Supplement: d1an00444a1.pdf [file d1an00444a1.pdf]

## SUPPLEMENTARY MATERIAL

### **Enhanced Photothermal Signal Detection by Graphene Oxide integrated Long Period Fiber Grating for on-site Quantification of Sodium Copper Chlorophyllin**

Wenjie Li<sup>a</sup>, Yinping Miao<sup>a, \*</sup>, Chengwei Fei<sup>b</sup>, Hongmin Zhang<sup>a</sup>, Bin Li<sup>a</sup>, and Kailiang Zhang<sup>a</sup>

<sup>a</sup> *Tianjin Key Laboratory of Film Electronic and Communicate Devices, School of Electrical and Electronic Engineering, Tianjin University of Technology, Tianjin 300384, China*

<sup>b</sup> *Department of Aeronautics and Astronautics, Fudan University, Shanghai 200433, China*

\* Corresponding author.

*E-mail address:* [kikosi@162.com](mailto:kikosi@162.com) (Yinping Miao)

The Supporting Information contains additional figures that provide more details for the following topics:

Figure S1. (a) Transmission spectrum and (b) intensity change of the LPFG at different temperatures.

Figure S2. SCC photothermal response under the different ambient temperatures.

Figure S3. The change of transmission spectrum with the concentration when (b) irradiated and (a) without.

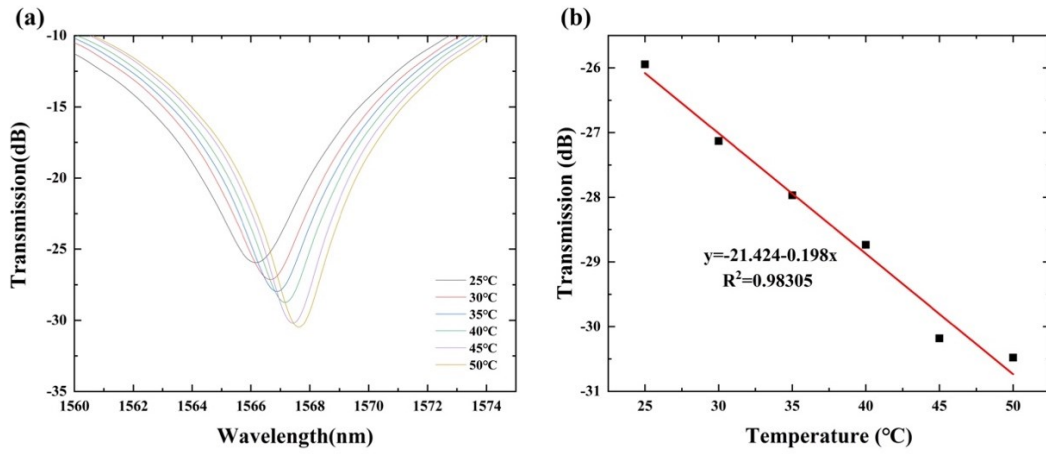

Figure S1. (a) Transmission spectrum and (b) intensity change of the LPFG at different temperatures.

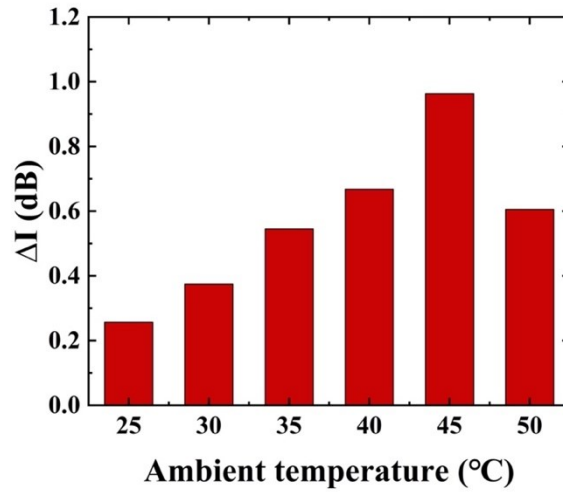

Figure S2. SCC photothermal response under the different ambient temperatures.

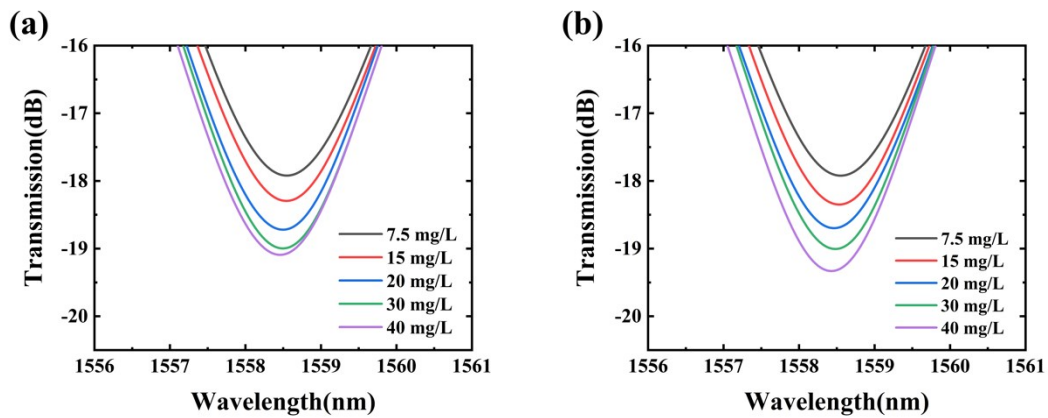

Figure S3. The change of transmission spectrum with the concentration when (b) irradiated and (a) without.
